# Supplementary material for: Novel Phenazine 5,10-Dioxides Release •OH in Simulated Hypoxia and Induce Reduction of Tumour Volume In Vivo
Source: PubMed Central journal article supplement (PMC3196961; doi:10.5402/2011/314209), 2011-06-22
Supplement: 314209.f1.pdf [file 314209.f1.pdf]

## **Supplementary online material**

**Novel phenazine 5,10-dioxides release ·OH in simulated hypoxia  
and induce reduction of tumour volume in vivo**

María L. Lavaggi, Mauricio Cabrera, Cristina Pintos, Carolina Arredondo, Gisela  
Pachón, Jorge Rodríguez, Stella Raymondo, José Pedro Pacheco, Marta  
Cascante, Claudio Olea-Azar, Adela López de Ceráin, Antonio Monge, Hugo  
Cerecetto, Mercedes González

| DAY                           |     |     |      |       |       |       |       |       |                               |
|-------------------------------|-----|-----|------|-------|-------|-------|-------|-------|-------------------------------|
| 1                             | 2-4 | 5-7 | 8-11 | 12-14 | 15-18 | 19-21 | 22-25 | 26-28 | 29                            |
| ◆                             | ◆   | ◇   | ◆    | ◇     | ◆     | ◇     | ◆     | ◇     | <b>sacrifice</b>              |
| <b>Begin of the treatment</b> |     |     |      |       |       |       |       |       | <b>experimental end point</b> |

**Figure 1S.** Schedules of the treatment of healthy and unhealthy rats. ◆: The animals received intraperitoneally one daily dose of vehicle solution, **PDO1** (50 mg/kg b.w.) or **PDO2** (50 mg/kg b.w.); ◇: The animals rested, they did not receive any injection. All the treatments began when the tumours reached approximately 4 mm in diameter.

**Table 1S.** Determination of maximum tolerated dose (MTD) for drugs **PDO1**, and **PDO2**.

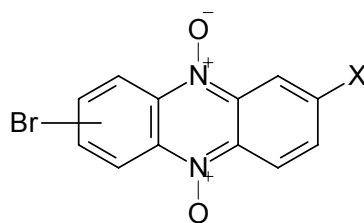

| Comp.       | -X               | Dose (mg/kg)     | Weight reduction(%) <sup>a</sup> |
|-------------|------------------|------------------|----------------------------------|
|             |                  | 60               | 3.4                              |
| <b>PDO2</b> | -NH <sub>2</sub> | 120              | 3.4                              |
|             |                  | 300 <sup>b</sup> | 4.5                              |
|             |                  | 60               | 0                                |
| <b>PDO1</b> | -OH              | 120              | 5.7                              |
|             |                  | 300 <sup>b</sup> | 11.7                             |

<sup>a</sup> Weight reduction is expressed as the percentage of weight reduction of treated animals respect to control animals (untreated ones) on day 3. <sup>b</sup> Solubility problems did not allow to study higher doses.

**Table 2S.** Mean values of the biochemical and the haematological findings in healthy-animals treated with **PDO1**, **PDO2**, and vehicle solution according to schedule shown in Figure 1S.

| <b>Comp.</b>                            | <b>Dose (mg/kg<br/>b.w./day)</b> | <b>WBC<br/>(10<sup>9</sup>/L)<sup>a</sup></b> | <b>HGB<br/>(g/L)<sup>b</sup></b> | <b>HCT<br/>(%)<sup>c</sup></b> | <b>GOT/AST<br/>(U/L)<sup>d</sup></b> | <b>GPT/ALT<br/>(U/L)<sup>e</sup></b> | <b>UREA<br/>(mg/dL)</b> | <b>CRE<br/>(mg/dL)<sup>f</sup></b> | <b>GLU<br/>(g/L)<sup>g</sup></b> |
|-----------------------------------------|----------------------------------|-----------------------------------------------|----------------------------------|--------------------------------|--------------------------------------|--------------------------------------|-------------------------|------------------------------------|----------------------------------|
| <b>PDO2</b>                             | 50                               | 2.9                                           | 111                              | 36.9                           | 196                                  | 38                                   | 43                      | 0.42                               | 157                              |
| <b>PDO1</b>                             | 50                               | 3.9                                           | 129                              | 41.0                           | 158                                  | 48                                   | 40                      | 0.44                               | 118                              |
| <b>Control</b>                          | vehicle solution                 | 1.6                                           | 99.7                             | 30.8                           | 319                                  | 51                                   | 42                      | 0.46                               | 130                              |
| <b>Reference<br/>values<sup>h</sup></b> | -                                | 6-18                                          | 110-192                          | 35-48                          | 47-176                               | 35-80                                | 15-21                   | 0.5-1.0                            | 50-160                           |

<sup>a</sup> WBC: White blood cells. <sup>b</sup> HGB: haemoglobin. <sup>c</sup> HCT: hematocrite. <sup>d</sup> GOT/AST: glutamic-oxalacetate transaminase (aspartate ketoglutarate aminotransferase). <sup>e</sup> GPT/ALT: glutamic-pyruvate transaminase (alanine aminotransferase); normal value. <sup>f</sup> CRE: creatinine. <sup>g</sup> GLU: glycaemia. <sup>h</sup> From Research Animal Resources, University of Minnesota (<http://www.ahc.umn.edu/rar/refvalues.html>) and <http://www.fauvet.fau.edu/oacm/VetData/Handouts/ratHO.htm> (accessed 05/07/2010).

**Table 3S.** Summary of the histopathologic studies on **PDO1**-treated tumours and untreated-tumours.

| <b>OBSERVATION</b>         | <b>PDO1-treated</b> | <b>untreated</b> |
|----------------------------|---------------------|------------------|
| Papillary cystic carcinoma | <b>+</b>            | <b>+</b>         |
| Necrosis                   | <b>-</b>            | <b>+++</b>       |
| Presence of immune cells   | <b>+++</b>          | <b>+/-</b>       |
| Collagen                   | <b>+++</b>          | <b>+/-</b>       |
| Compartmentalization       | <b>+</b>            | <b>-</b>         |
| Ducts and cords            | <b>-</b>            | <b>+</b>         |
